# Supplementary material
Source: PubMed Central journal article supplement (PMC6822283)
Supplement: mmc1.pdf [file mmc1.pdf]

YMTHE, Volume 27

## **Supplemental Information**

**Blocking CD30 on T Cells by a Dual Specific CAR  
for CD30 and Colon Cancer Antigens Improves  
the CAR T Cell Response against CD30<sup>-</sup> Tumors**

**Andreas A. Hombach, Gunter Rappl, and Hinrich Abken**

SUPPLEMENTAL INFORMATION

A

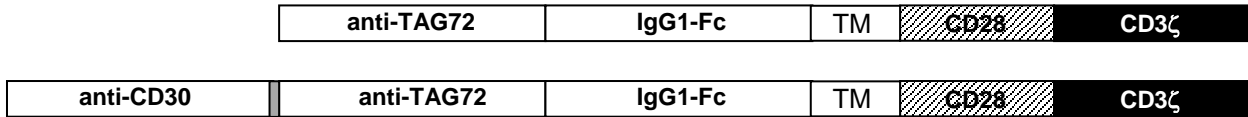

B

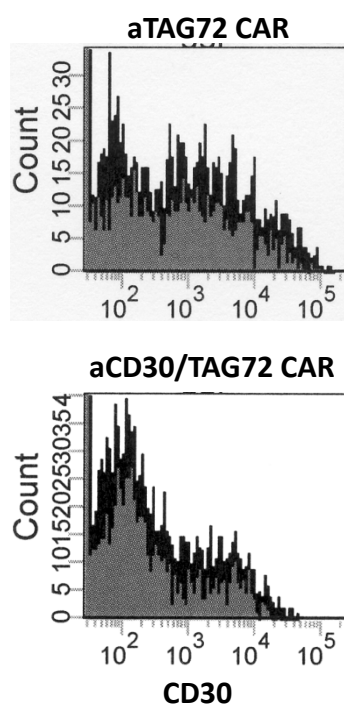

C

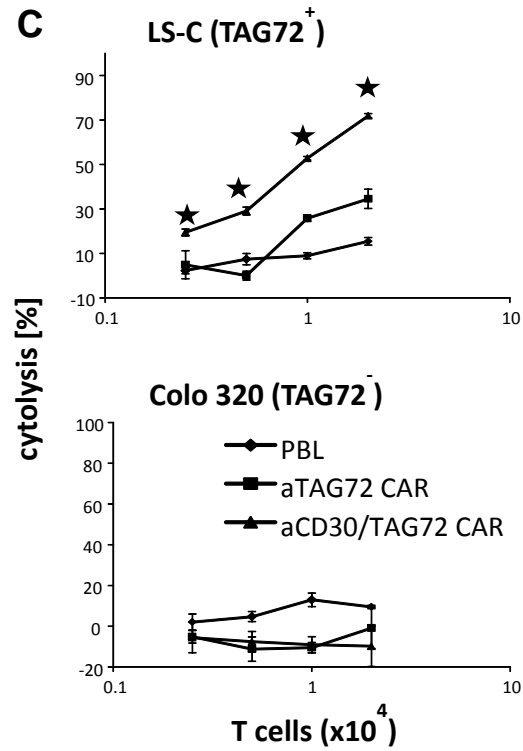

Figure S1

Superior target cell lysis of TAG72<sup>+</sup> tumor cells by T cells with the anti-CD30/TAG72 CAR.

(A) Schematic representation of anti-TAG72 and anti-CD30/TAG72 CAR.

(B) CD30/TAG72 CAR T cells down-modulate CD30 expression. T cells with anti-TAG72 or anti-CD30/TAG72 CAR were cultivated in the presence of 500 U/ml IL-2. Cells were tested for CD30

by staining with an APC-conjugated anti-CD30 mAb 3 days after transduction and analyzed by flow cytometry.

(C) T cells with anti-TAG72, anti-CD30/TAG72 CAR and without CAR, respectively, were incubated in same numbers for 48 h with TAG72<sup>+</sup> LS-C or TAG72<sup>-</sup> Colo320 tumor cells (each 2.5 x10<sup>4</sup> cells/well). Viability of target cells was determined by the XTT assay and cytotoxicity was calculated. Data represent the mean values of technical replicates of a representative experiment  $\pm$  SD. Significant differences were determined by the Student's t test.
